# Supplementary material for: Influence of PEGDA Molecular Weight and Concentration on the In Vitro Release of the Model Protein BSA–FITC from Photo Crosslinked Systems
Source: MDPI journal article supplement (doi:10.3390/pharmaceutics15041039), 2023-03-23
Supplement: s1 [file s1]

## Supplementary Material

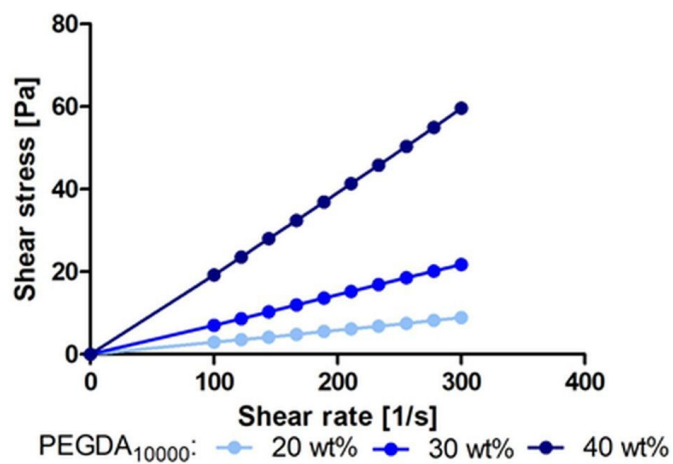

**Figure S1.** Exemplary shear stress/shear rate representation of PEGDA<sub>10000</sub> solutions in H<sub>2</sub>O/MeOH (1:2) with different concentrations of the polymer at 15 °C (n = 3).

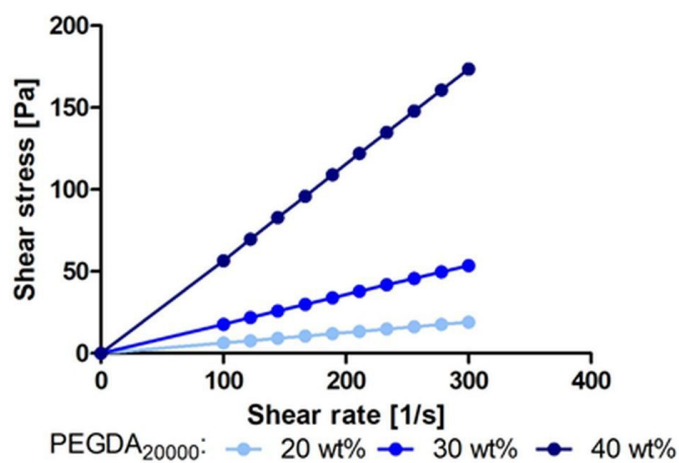

**Figure S2.** Exemplary shear stress/shear rate representation of PEGDA<sub>20000</sub> solutions in H<sub>2</sub>O/MeOH (1:2) with different concentrations of the polymer at 15 °C (n = 3).

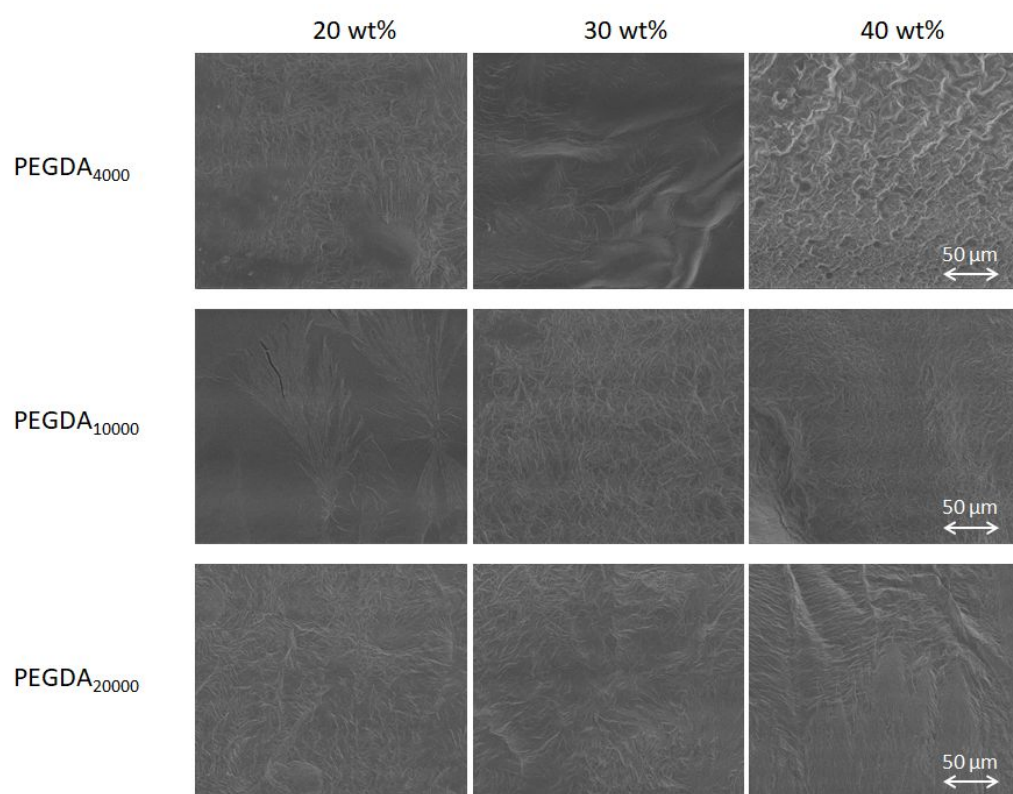

**Figure S3.** Comparison of SEM images of the surface of PEGDA samples with different molecular masses (4000, 10,000, and 20,000 g/mol) and their concentrations with BSA-FITC.

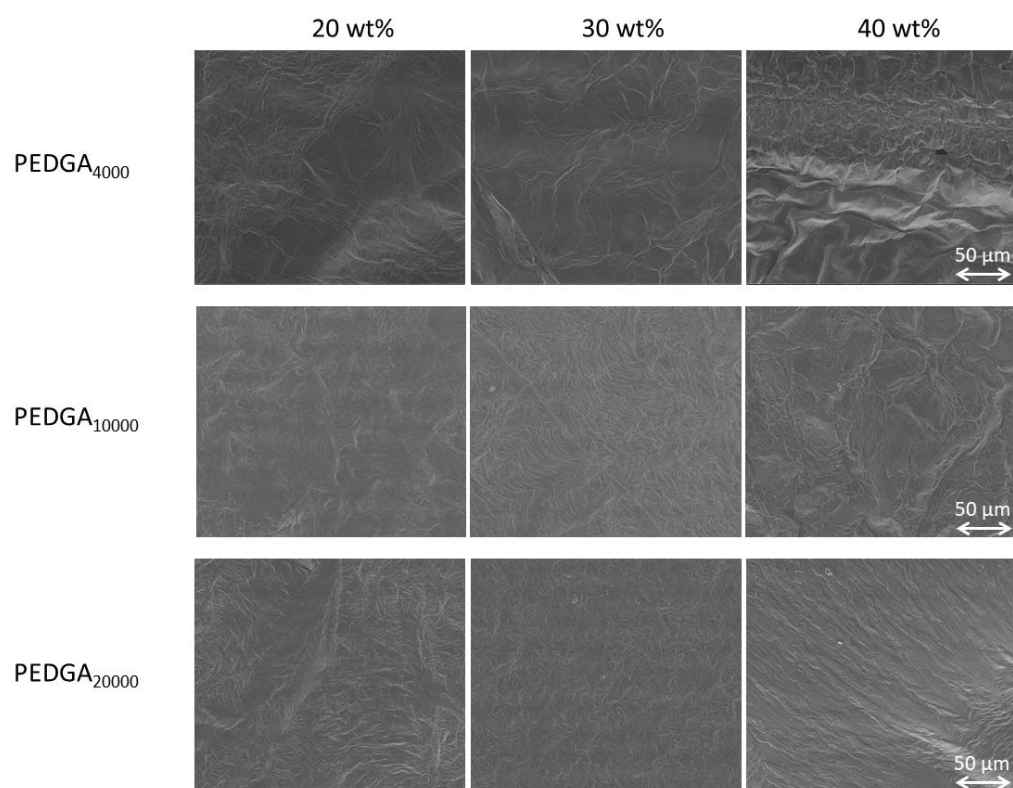

**Figure S4.** Comparison of SEM images of the surface of PEGDA samples with different molecular masses (4000, 10,000, and 20,000 g/mol) and their concentrations without BSA-FITC.

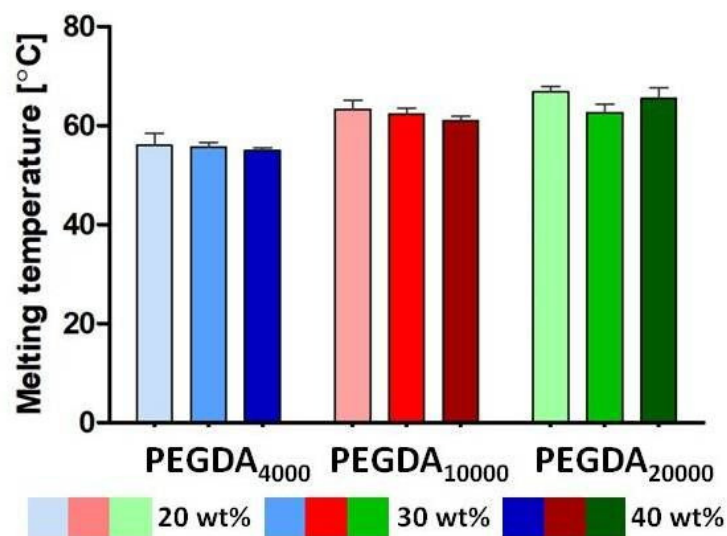

**Figure S5.** Mean Melting temperature[°C] with SD for PEGDA<sub>4000</sub>, PEGDA<sub>10000</sub> and PEGDA<sub>20000</sub> samples containing 20, 30, or 40 wt % of the polymer without BSA-FITC (n = 3).

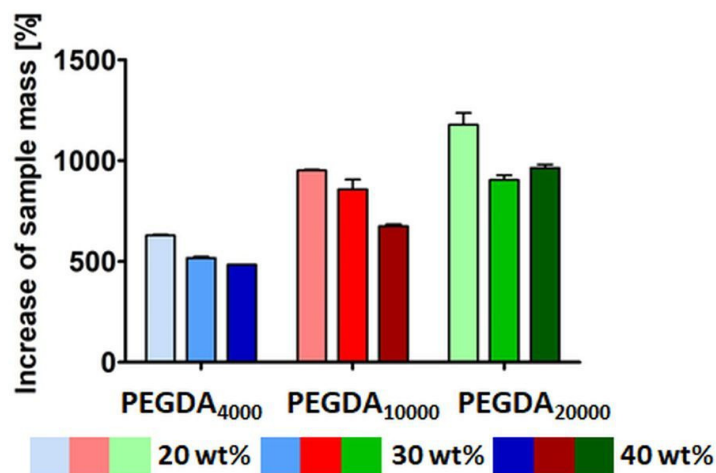

**Figure S6.** Increase in sample ( $\varnothing = 6$  mm, thickness = 1 mm) weight (pure PEGDA without BSA-FITC) in percentage with SD after 24 h swelling in a TES buffer at 37 °C (n = 3).

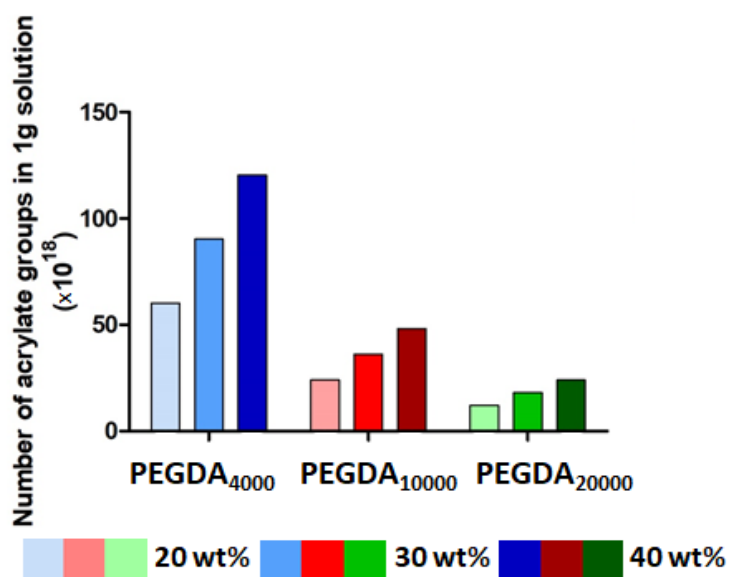

**Figure S7.** Theoretical number of free acrylate groups in 1 mL of unpolymerized of different PEGDA solutions.

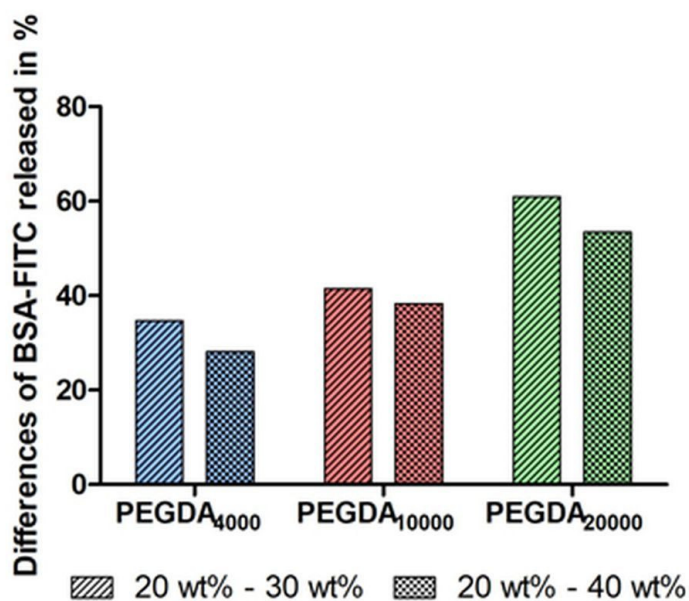

**Figure S8.** Differences between the 20–30 and 20–40 wt % PEGDA samples in the released amount of BSA–FITC.

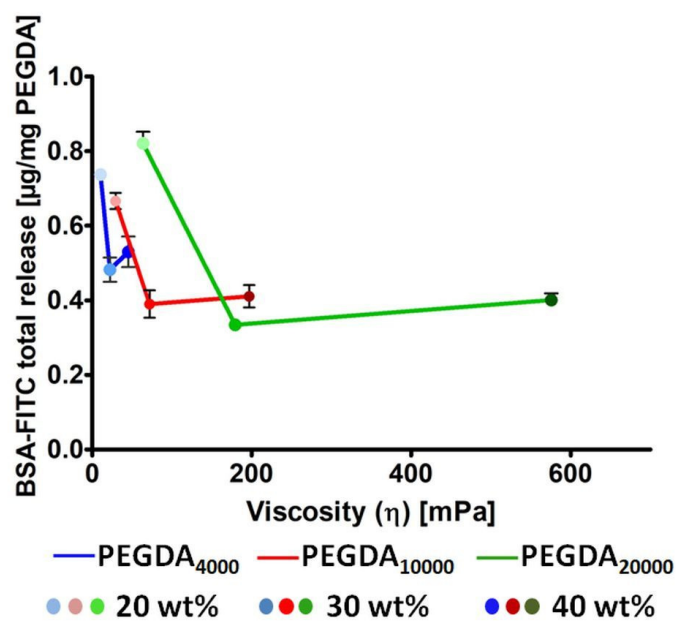

**Figure S9.** Relationship between total BSA–FITC release and PEGDA viscosity (4000, 10,000, and 20,000 g/mol) solutions (20, 30, and 40 wt %).
